# Supplementary material for: The draft mitochondrial genome of Magnolia biondii and mitochondrial phylogenomics of angiosperms
Source: PubMed Central journal article supplement (PMC7159230; doi:10.1371/journal.pone.0231020), 2020-04-15
Supplement: pone.0231020.s001.pdf [file pone.0231020.s001.pdf]

**S1 Table. Sequencing statistics.**

| Sequencing          | Library type | Raw data                |                       |                            |           | Clean data       |                            |                            |           |
|---------------------|--------------|-------------------------|-----------------------|----------------------------|-----------|------------------|----------------------------|----------------------------|-----------|
|                     |              | Read length (mean; max) | Total number of reads | Total number of bases (Gb) | Depth (X) | Read length (bp) | Total number of reads (bp) | Total number of bases (Gb) | Depth (X) |
| 10 x Genomics       | Genomic DNA  | 150<br>13,492;          | 1,169,695,614         | 175.45                     | 80.00     | 150              | 908,810,764                | 136.32                     | 61.96     |
| Oxford Nanopore     | Genomic DNA  | 1,123,682               | 12,836,970            | 174.10                     | 79.00     | 14,839           | 5,858,689                  | 86.94                      | 39.52     |
| illumina Hiseq 2000 | RNA-seq Leaf | 100                     | 51,326,726            | 4.62                       | NA        | 100              | 25,703,370                 | 2.20                       | NA        |
