# Supplementary material for: The draft mitochondrial genome of Magnolia biondii and mitochondrial phylogenomics of angiosperms
Source: PubMed Central journal article supplement (PMC7159230; doi:10.1371/journal.pone.0231020), 2020-04-15
Supplement: pone.0231020.s004.pdf [file pone.0231020.s004.pdf]

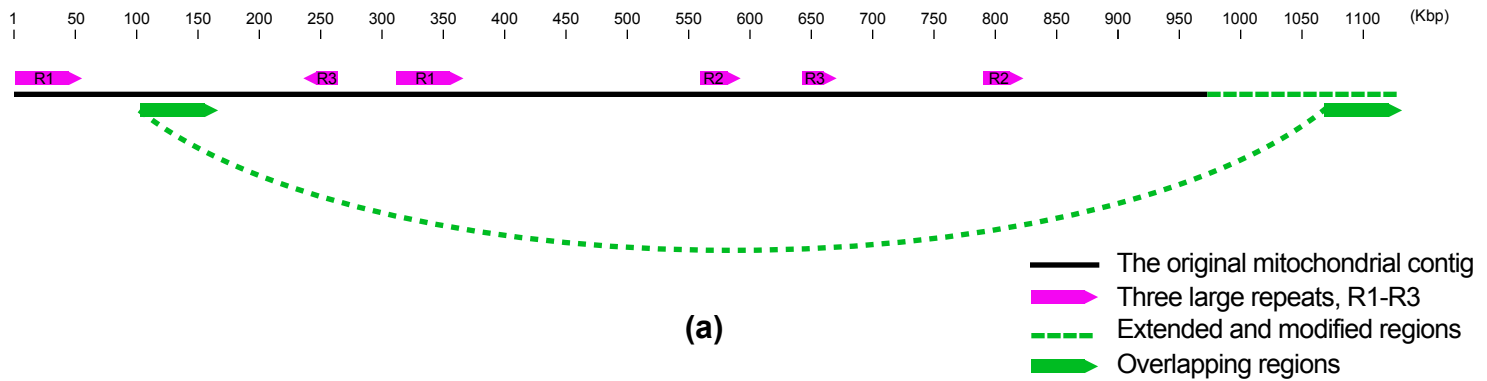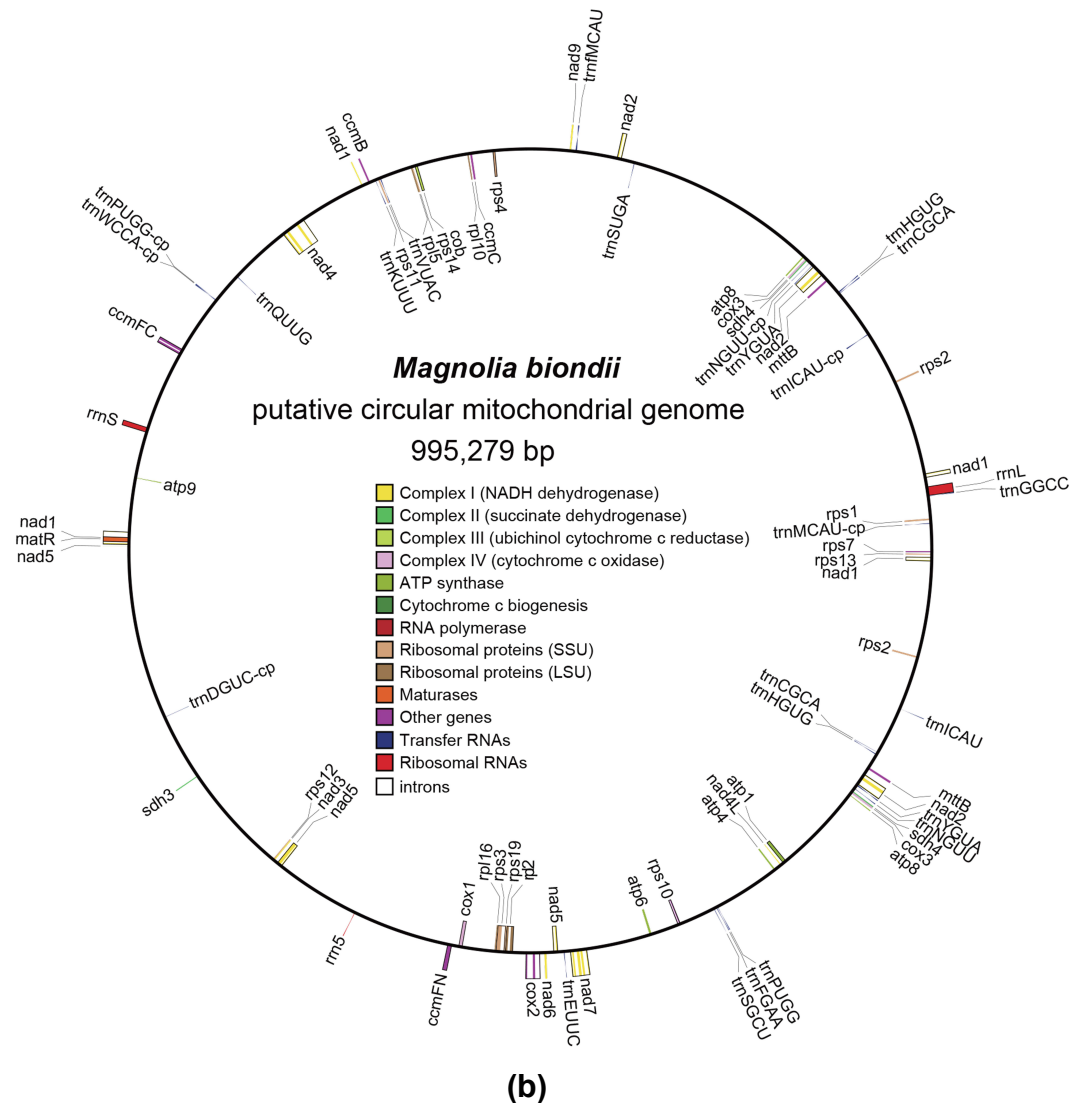

**S2 Fig. The line plot and the genome map of the circular molecule of the putative mitochondrial genome of *Magnolia biondii*: (a) the line plot of the generation of the circular molecule; and (b) the genome map of the putative circular mitochondrial genome generated by OGDRAW V1.2. Genes outside of the circle are transcribed clockwise, whereas those inside are transcribed counter-clockwise. Genes from the same protein complex are colored the same, introns are indicated in white boxes.**
