# Supplementary material for: The draft mitochondrial genome of Magnolia biondii and mitochondrial phylogenomics of angiosperms
Source: PubMed Central journal article supplement (PMC7159230; doi:10.1371/journal.pone.0231020), 2020-04-15
Supplement: pone.0231020.s005.pdf [file pone.0231020.s005.pdf]

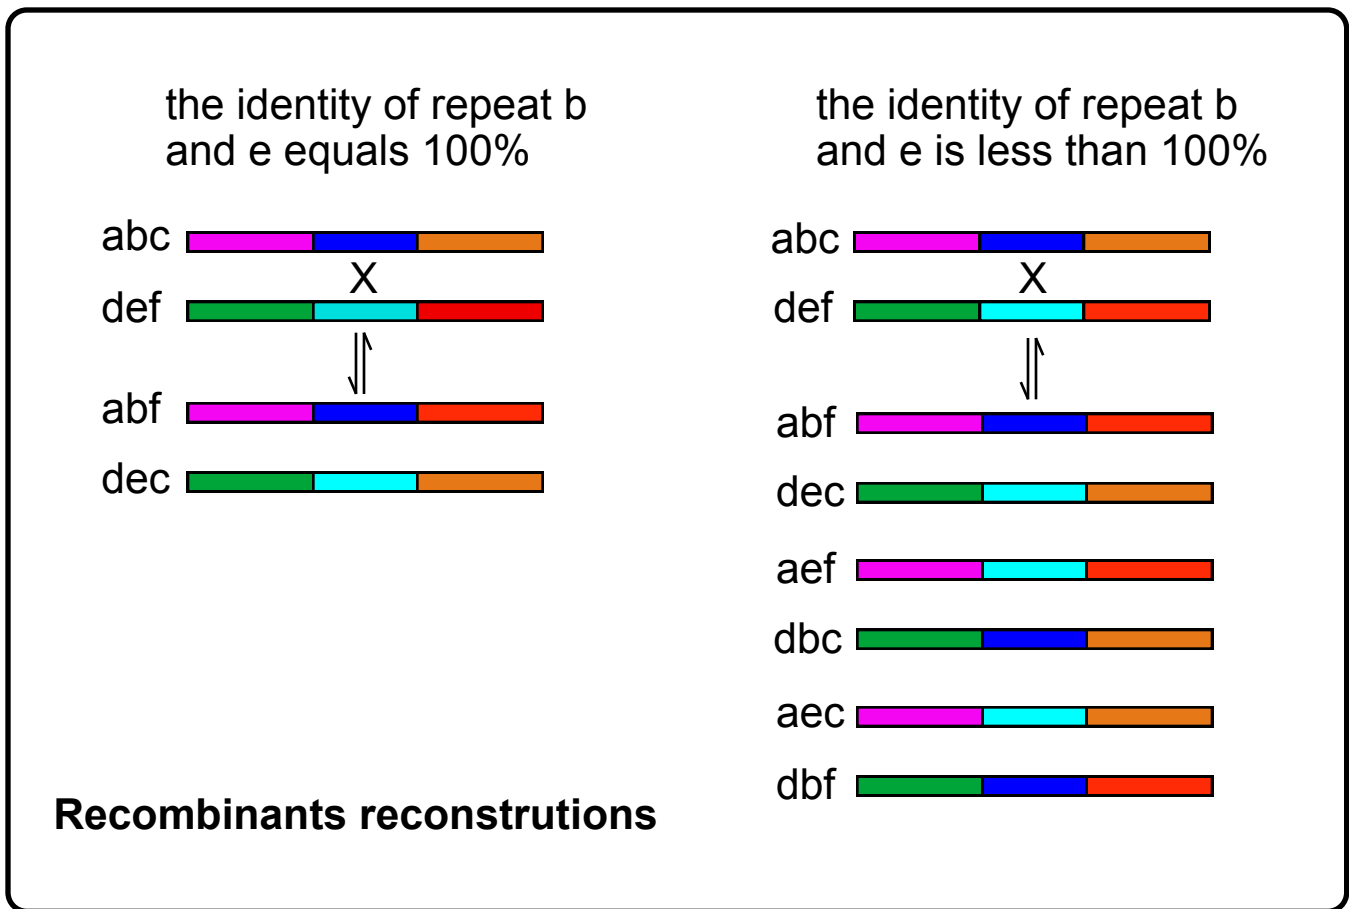

↓ **Blastn**

**Nanopore Mt reads data base of *Magnolia biondii***

↓ **Statistics**

**Calculate the ratio of recombinant molecules**

S3 Fig. The flow chart for repeat recombination analysis of the repeated sequences in the mitochondrial genome of *Magnolia biondii*.
